# Supplementary material for: Decoding local and global fNIRS patterns of kinesthetic and visual-motor imagery in a haptic interface paradigm
Source: Research Square preprint supplement (doi:10.21203/rs.3.rs-8755982/v1), 2026-02-05
Supplement: Supplementary file 1 [file 835ba15c27b2981546504e1a.docx]

Decoding local and global fNIRS patterns of kinesthetic and visual-motor imagery in a haptic interface paradigm

Robert Kwaśniak, Arkadiusz Ziółkowski Paweł Augustynowiczand Dariusz Zapała


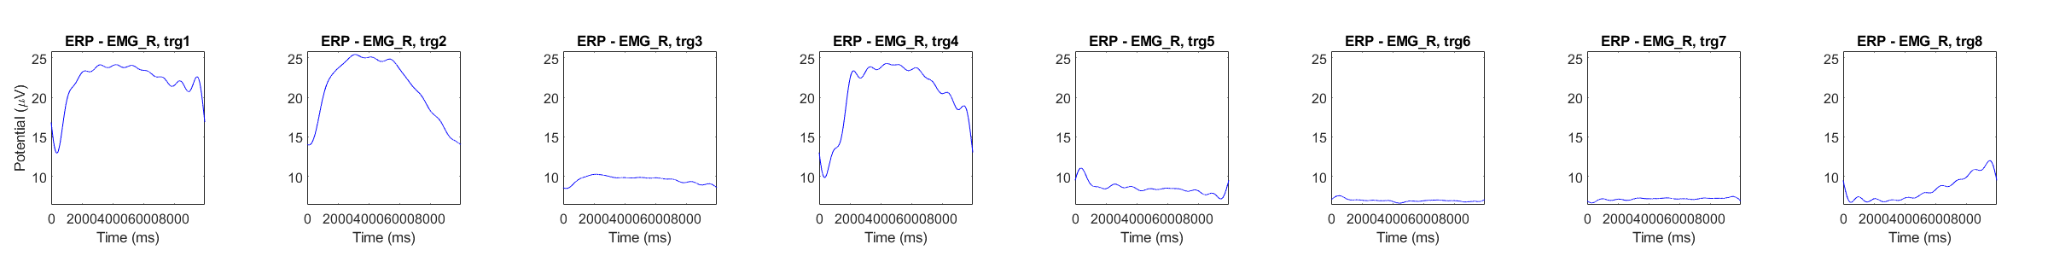


*Fig 1.* The graphs show muscle tension for both grip compression and imagery for the right hand, for KMI and VMI. The third graph shows muscle tension in uV during imagery for the KMI condition, and the seventh graph shows muscle tension in uV during imagery for the VMI condition.
